# Supplementary material
Source: Springer Nature journal article supplement (https://www.springermedizin.de/resource/supplementary/12960_2012_379_MOESM2_ESM.pdf/9569974)

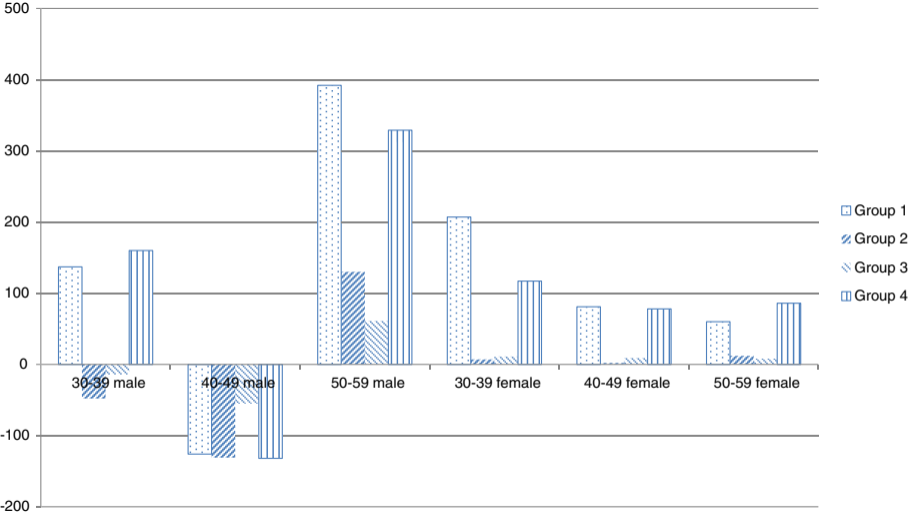

Groups were classified according to principal component scores

Supplement: MOESM2 [file 9569974]
